# Supplementary material for: Physician practice in food allergy prevention in the Middle East and North Africa
Source: BMC Pediatr. 2017 May 5;17:118. doi: 10.1186/s12887-017-0871-3 (PMC5418846; doi:10.1186/s12887-017-0871-3)
Supplement: Supplementary file 1 — Survey questionnaire in English. (PDF 23 kb) [file 12887_2017_871_MOESM1_ESM.pdf]

## Allergy Prevention Survey

For the purpose of this survey, an **infant at risk for developing allergy** is defined as an infant without allergic symptoms but with at least one first degree relative (parent or sibling) with one or more allergic disease, including : allergic rhinitis, asthma, urticaria, atopic dermatitis (eczema), food allergy. The allergic disease must be diagnosed by a physician or the patient must clearly depend on a relevant treatment.

- 1) Do you routinely identify **infants at risk for developing allergy**?
  - a) Yes
  - b) No
- 2) In the **infant at risk for developing allergy**, do you recommend exclusive breastfeeding for at least 4 months?
  - a) Yes
  - b) No
- 3) In the **infant at risk for developing allergy**, who is exclusively breast fed; do you routinely recommend avoidance of any of the allergenic foods (cow's milk, egg, fish, peanut, soy, wheat) in the lactating mother?
  - i) Yes

If yes: which foods? .....

- b) No
- 4) In the **infant at risk for developing allergy**, who is breast and formula fed (mix feeding); which type of formula do you recommend?
  - a) Standard (Regular) infant formula
  - b) Partially hydrolysed formula (HA formula)
  - c) Extensive hydrolysed formula
  - d) Soy infant formula
  - e) Other? Please specify.....
- 5) In the **infant at risk for developing allergy**, who is completely formula fed; which type of formula do you recommend?
  - a) Standard (Regular) infant formula

## Allergy Prevention Survey

- b) Partially hydrolysed formula (HA formula)
- c) Extensive hydrolysed formula
- d) Soy infant formula
- e) Other? Please specify.....

6) In the **infant at risk for developing allergy**, do you recommend delaying the introduction of complementary foods compared to non-at-risk infants?

- a) Yes
- b) No

7) In the **infant at risk for developing allergy**, do you routinely recommend postponing the introduction of potentially allergenic foods (egg, cow's milk, wheat, fish, peanut) compared to non-at-risk infants?

- a) Yes
  - i) If yes: which foods? .....
- b) No
